# Supplementary material for: Energy transfer and luminescent properties of Ca8MgLu(PO4)7:Tb3+/Eu3+ as a green-to-red color tunable phosphor under NUV excitation
Source: Royal Society of Chemistry journal article supplement (doi:10.1039/c5ra08680a), 2015-01-01
Supplement: c5ra08680a1.pdf [file c5ra08680a1.pdf]

## Electronic Supplementary Information (ESI)

Energy Transfer and Luminescent Properties of  
 $\text{Ca}_8\text{MgLu}(\text{PO}_4)_7:\text{Tb}^{3+}/\text{Eu}^{3+}$  as a Green-to-red Color Tunable Phosphor  
under NUV Excitation

Feiyan Xie,<sup>a,b</sup> Junhao Li,<sup>b</sup> Zhiyue Dong,<sup>b</sup> Dawei Wen,<sup>b</sup> Jianxin Shi<sup>b\*</sup>, Jing Yan<sup>b</sup> and  
Mingmei Wu<sup>b\*</sup>

a) Department of Chemical Engineering, Huizhou University, Huizhou 516007, P. R.  
China

b) Key Laboratory of Bioinorganic and Synthetic Chemistry of Ministry of Education,  
School of Chemistry and Chemical Engineering, Sun Yat-Sen University, Guangzhou  
510275, P. R. China

**Email: ccssjx@mail.sysu.edu.cn**

**ceswmm@mail.sysu.edu.cn**

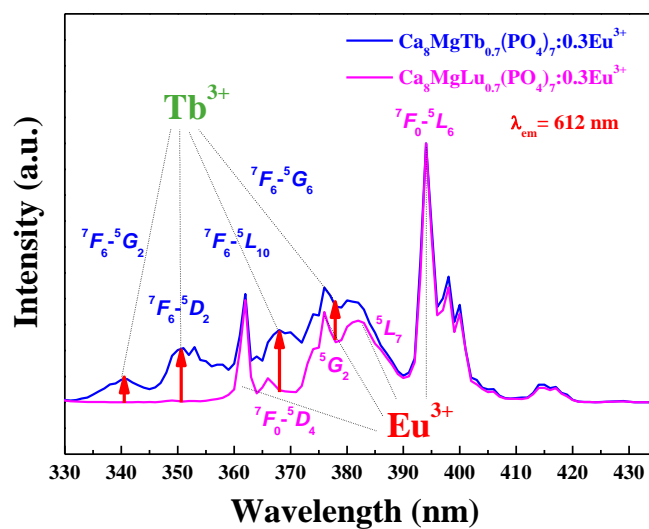

**Fig. S1** The PLE of  $\text{Ca}_8\text{MgLu}(\text{PO}_4)_7:\text{Eu}^{3+}$  and  $\text{Ca}_8\text{MgTb}(\text{PO}_4)_7:\text{Eu}^{3+}$

**Table S1.** Comparison of the CIE chromaticity coordinates for  $\text{Ca}_8\text{MgTb}_{0.1}(\text{PO}_4)_7:0.9\text{Eu}^{3+}$  excited at 378 nm at different temperatures.

| Sample no. | Temperature (°C) | CIE coordinates (x, y) |
|------------|------------------|------------------------|
| 1          | 25               | (0.628, 0.343)         |
| 2          | 50               | (0.629, 0.343)         |
| 3          | 75               | (0.630, 0.343)         |
| 4          | 100              | (0.629, 0.343)         |
| 5          | 125              | (0.524, 0.443)         |
| 6          | 150              | (0.630, 0.343)         |
| 7          | 175              | (0.629, 0.344)         |
| 8          | 200              | (0.628, 0.345)         |
